# Supplementary material for: Exceptional electrochemical performance of rechargeable Li–S batteries with a polysulfide-containing electrolyte
Source: Royal Society of Chemistry journal article supplement (doi:10.1039/c3ra23070h), 2013-01-01
Supplement: c3ra23070h.pdf [file c3ra23070h.pdf]

# Exceptional electrochemical performance of rechargeable Li-S batteries with polysulfide-containing electrolyte

Shuru Chen, Fang Dai, Mikhail L. Gordin, and Donghai Wang\*

*Department of Mechanical and Nuclear Engineering, The Pennsylvania State University, University Park, PA 16802*

## Experimental Details

### Materials:

Dimethoxyethane (DME), dioxolane (DOL) and lithium bis(trifluoromethanesulfonyl)imide (LiTFSI) certified to contain less than 20 ppm H<sub>2</sub>O were obtained from Novolyte Technologies. Sulfur (99.5%), Li<sub>2</sub>S (99.9%) and LiNO<sub>3</sub> (99.999%) were purchased from Alfa Aesar. All the chemicals were used as received.

### Synthesis:

A reference electrolyte of 0.1 M LiTFSI + 0.2 M LiNO<sub>3</sub> in DOL/DME (1:1, v:v) was prepared first by dissolving proper amounts of LiTFSI and LiNO<sub>3</sub> in DOL/DME (1:1, v:v). To this solution, stoichiometric amounts of elemental sulfur and pristine Li<sub>2</sub>S were added to form polysulfide-containing electrolytes of the required sulfur concentration ([S]) and average polysulfide chain length. The reaction and dissolution were complete after stirring for 6 h at 75 °C followed by 48 h at room temperature. Polysulfide-containing electrolytes prepared in this way were dark red and of moderate viscosity.

Sulfur cathodes were prepared by ball milling 50 wt% elemental sulfur, 40 wt% Super P carbon black, and 10 wt% PVDF binder in NMP solution at 300 rpm for 3 h to make the slurry, and then spreading the slurry on aluminium foil using a common doctor-blade coating method. After drying at 55 °C under vacuum overnight, the electrodes were cut into circular pieces of 1.13 cm<sup>2</sup> (12 mm diameter) with sulfur loading of about 0.6 mg cm<sup>-2</sup> and incorporated into CR-2016 coin-type cells with a precisely controlled amount of either polysulfide-free or -containing electrolyte. All the electrolyte preparation and cell assembly steps were performed in an Ar-filled glove box with O<sub>2</sub> and H<sub>2</sub>O less than 1 ppm.

### Characterization:

The coin-type cells were galvanostatically cycled on battery testing systems (Neware BTS-5V1mA or Arbin BT-2000) at room temperature. The cutoff potentials for charge and discharge were set at 2.6 V and 1.6 V vs. Li<sup>+</sup>/Li, respectively. Cyclic voltammetry (CV) scanning was carried out on a CHI660 system using coin-type cells and with a scanning rate of 0.1 mV s<sup>-1</sup>.

## Additional Figures

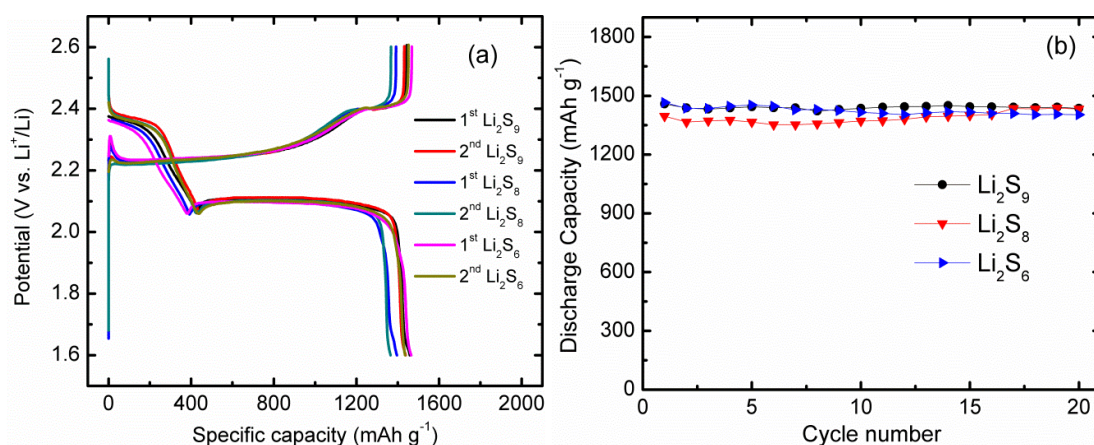

**Figure S1.** (a) Voltage profiles and (b) cycling performance at C/3 rate in 10  $\mu\text{L}$  of polysulfide-containing electrolytes with different average polysulfide chain lengths and sulfur concentration  $[\text{S}]=2 \text{ M}$  between 1.6 V and 2.6 V.

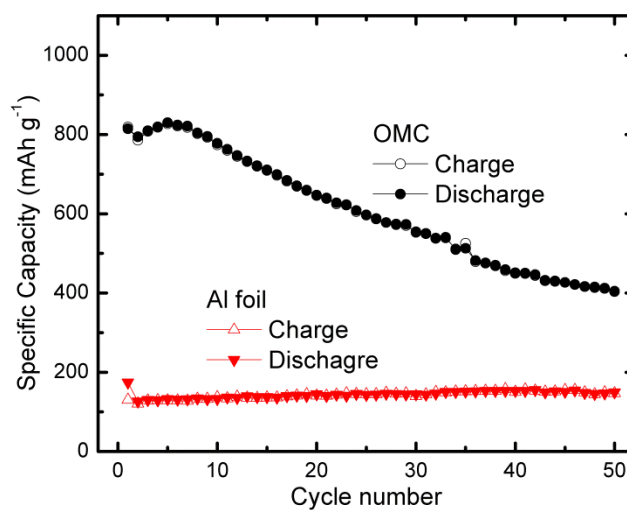

**Figure S2.** Cycling performance at a current density of  $0.3 \text{ mA/cm}^2$  in 10  $\mu\text{L}$  of polysulfide-containing electrolyte with sulfur concentration  $[\text{S}]=2 \text{ M}$  charged/discharged between 1.6 V and 2.6 V using an Al foil and an ordered mesoporous carbon (OMC, as reported in the literature<sup>1</sup>) electrode of  $1.13 \text{ cm}^2$  as the positive electrodes.

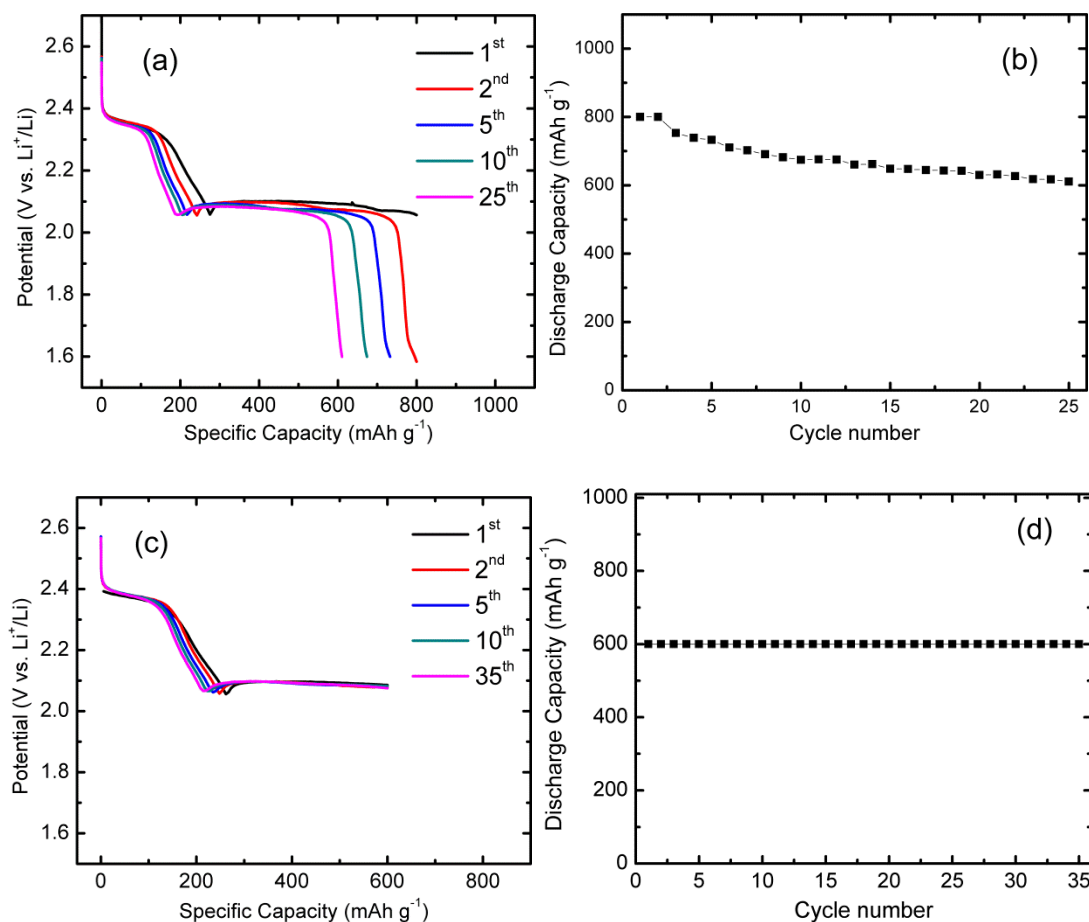

**Figure S3.** (a, c) Voltage profiles and (b, d) cycling performance at C/10 rate in 10  $\mu\text{L}$  of polysulfide-free electrolyte discharged with a cut-off voltage at 1.6 V and a cut-off discharge capacity of (a, b) 800  $\text{mAh/g}$  and (c, d) 600  $\text{mAh/g}$  (cells stopped discharging at whichever condition was met first). It is clear that cycling performance was greatly improved when a cut-off discharge capacity of 600  $\text{mAh g}^{-1}$  was selected.

#### References:

1. S. R. Chen, Y. P. Zhai, G. L. Xu, Y. X. Jiang, D. Y. Zhao, J. T. Li, L. Huang and S. G. Sun, *Electrochim. Acta*, 2011, **56**, 9549-9555.
